CORRECTION

## Correction: Predicting art university students' entrepreneurial intention: A hybrid SEM–ANN approach

Yiliang Cao, Jie Zhang

There is an error in affiliation 1 for author Yiliang Cao. The correct affiliation 1 is: College of Liberal Arts, Liaoning University, Shenyang, China.

### Reference

1. Cao Y, Zhang J. Predicting art university students' entrepreneurial intention: A hybrid SEM–ANN approach. PLoS One. 2025;20(8):e0330833. <https://doi.org/10.1371/journal.pone.0330833> PMID: [40839606](https://pubmed.ncbi.nlm.nih.gov/40839606/)

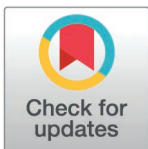

### OPEN ACCESS

**Citation:** Cao Y, Zhang J (2026) Correction: Predicting art university students' entrepreneurial intention: A hybrid SEM–ANN approach. PLoS One 21(4): e0348095. <https://doi.org/10.1371/journal.pone.0348095>

**Published:** April 27, 2026

**Copyright:** © 2026 Cao, Zhang. This is an open access article distributed under the terms of the [Creative Commons Attribution License](https://creativecommons.org/licenses/by/4.0/), which permits unrestricted use, distribution, and reproduction in any medium, provided the original author and source are credited.
